# Supplementary material for: Multiwalled carbon nanotubes–V2O5 integrated composite with nanosized architecture as a cathode material for high performance lithium ion batteries
Source: Royal Society of Chemistry journal article supplement (doi:10.1039/c3ta13143b), 2013-01-01
Supplement: c3ta13143b.pdf [file c3ta13143b.pdf]

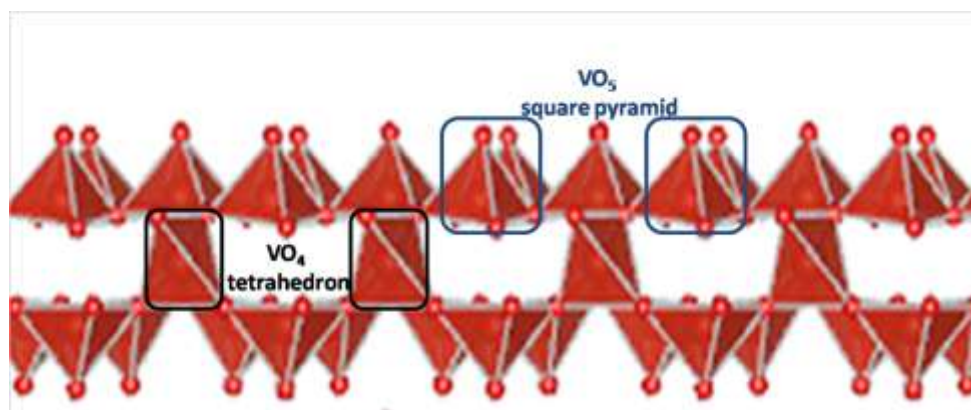

**Figure S1.** Schematic diagram of the structure of  $\text{VO}_x$  layer.

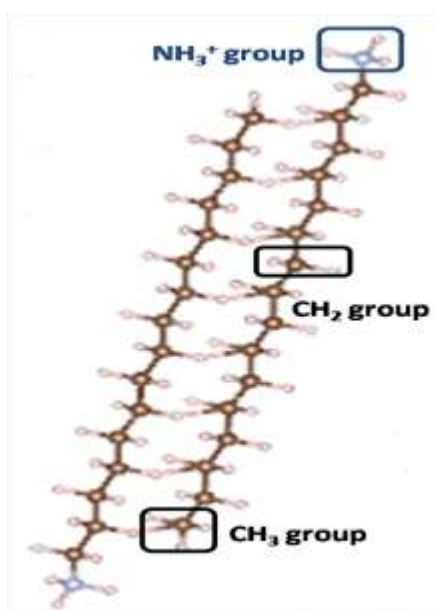

**Figure S2.** The protonated hexadecylamine molecules ( $\text{C}_{16}\text{H}_{33}\text{NH}_3^+$ ) antiparallel to one another with their positively charged  $\text{NH}_3^+$  groups pointing outward.

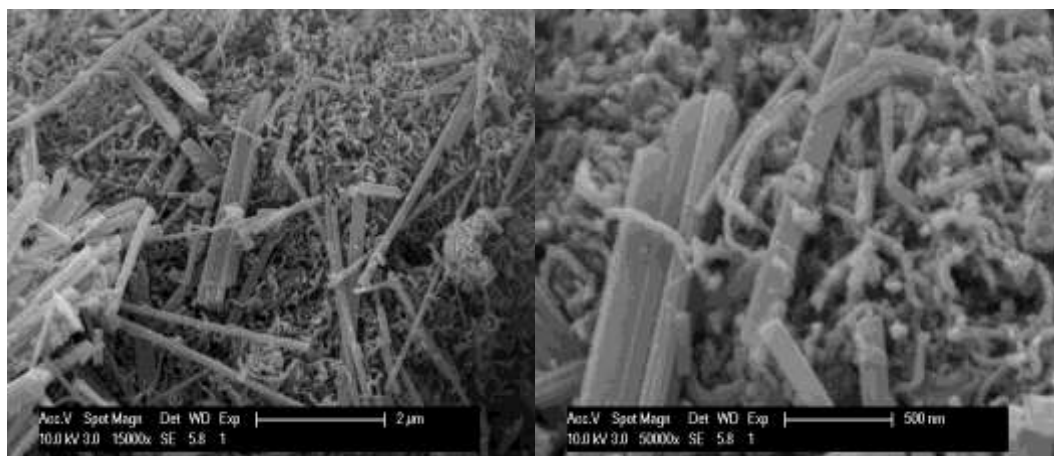

**Figure S3.** Vanadium oxide rods/MWCNTs mixture synthesized under the same hydrothermal condition without the addition of hexadecylamine as inter-mediator.

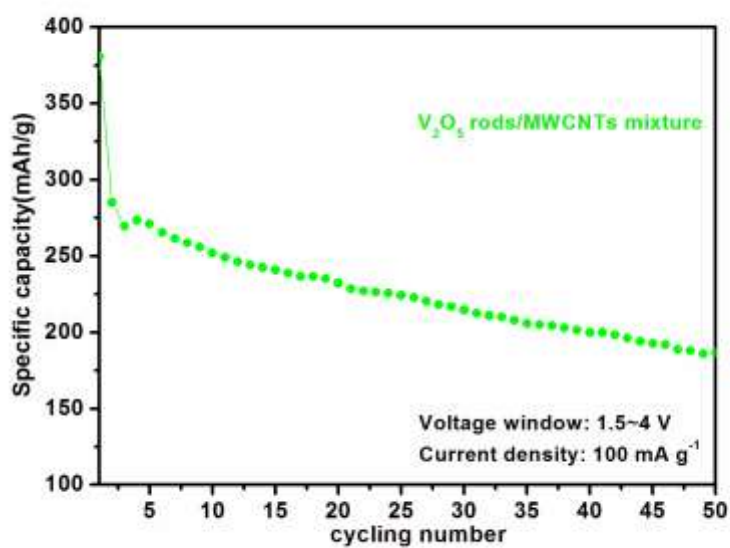

**Figure S4.** Cycling performance of vanadium oxide rods/MWCNTs mixture by post sintering at 400 °C in air under the current density of 100 mA g<sup>-1</sup> between 1.5-4 V.

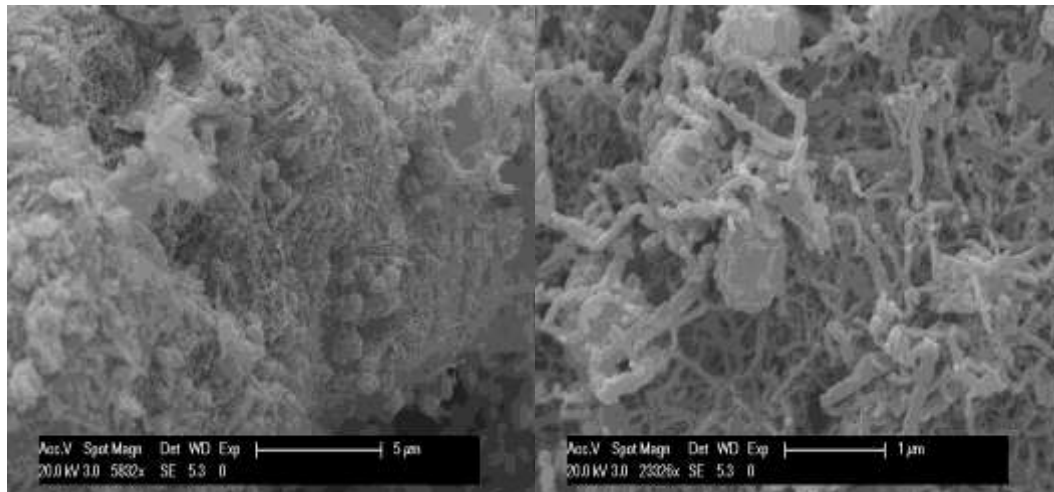

**Figure 5S.** MWCNTs-V<sub>2</sub>O<sub>5</sub> composite prepared with the 1/1 mass ratio of MWCNTs to V<sub>2</sub>O<sub>5</sub> through the same procedure using hexadecylamine as inter-mediator.
